# Supplementary material
Source: PubMed Central journal article supplement (PMC5957534)
Supplement: NIHMS965554-supplement-supplements.pdf [file NIHMS965554-supplement-supplements.pdf]

# Supporting information

## Application of Electrochemical Devices to Characterize the Dynamic Actions of Helicases on DNA

*Dimithree Kahanda,<sup>1†</sup> Kevin T. DuPrez,<sup>2†</sup> Eduardo Hilario,<sup>2</sup> Marc A. McWilliams,<sup>1</sup> Chris H.*

*Wohlgamuth,<sup>1</sup> Li Fan,<sup>2\*</sup> and Jason D. Slinker<sup>1\*</sup>*

<sup>1</sup>Department of Physics, The University of Texas at Dallas, 800 W. Campbell Rd., PHY 36, Richardson, TX 75080.

<sup>2</sup>Department of Biochemistry, University of California, 900 University Ave, Riverside, CA 92521

\*Email: [li.fan@ucr.edu](mailto:li.fan@ucr.edu); Phone: 951-827-3630; Fax: (951) 827-4434

\*Email: [slinker@utdallas.edu](mailto:slinker@utdallas.edu); Phone: 972-883-6513; Fax: 972-883-2848

### Contents

S-2: Crystallization data for 6xHis-StoXPB2

S-4: Image of the custom chip used in study

S-5: Images of custom temperature controlled electrochemical setup

S-6: Chemical drawings of the C6 linker and Nile Blue redox probe coupling

**Table S1: Crystallization data for 6xHis-StoXPB2**

Data collection and refinement statistics (molecular replacement)

|                                     |                           |
|-------------------------------------|---------------------------|
|                                     | Native                    |
| <b>Data collection</b>              |                           |
| Space group                         | P 43 21 2                 |
| Cell dimensions                     |                           |
| $a, b, c$ (Å)                       | 160.92, 160.92, 122.96    |
| $\alpha, \beta, \gamma$ (°)         | 90.00, 90.00, 90.00       |
| Resolution (Å)                      | 29.9 - 3.05 (3.21 - 3.05) |
| $R_{\text{merge}}$                  | 37.4 (290.4)              |
| $I / \sigma I$                      | 11.2 (2.0)                |
| CC1/2 (%)                           | 99.6 (62.9)               |
| Completeness (%)                    | 99.9 (100.00)             |
| Redundancy                          | 23.6 (23.4)               |
| <b>Refinement</b>                   |                           |
| Resolution (Å)                      | 30.00 - 3.05              |
| No. reflections                     | 29713                     |
| $R_{\text{work}} / R_{\text{free}}$ | 19.60 / 22.58             |
| No. atoms                           |                           |
| Protein                             | 6404                      |
| Sulfate Ion                         | 70                        |
| Chloride Ion                        | 7                         |
| Glycerol                            | 42                        |
| Water                               | 134                       |

*B*-factors

|            |       |
|------------|-------|
| Protein    | 99.61 |
| Ligand/ion | 97.44 |
| Water      | 61.54 |

R.m.s. deviations

|                  |        |
|------------------|--------|
| Bond lengths (Å) | 0.0098 |
| Bond angles (°)  | 1.3146 |

Ramachandran

|              |       |
|--------------|-------|
| Core         | 86.8% |
| Allowed      | 13.2% |
| Gen. Allowed | 0.0%  |
| Outliers     | 0.0%  |

\*2 crystals were used for data process and structure determination.

\*Values in parentheses are for highest-resolution shell.

**Figure S1:** Images of the custom chip used for study

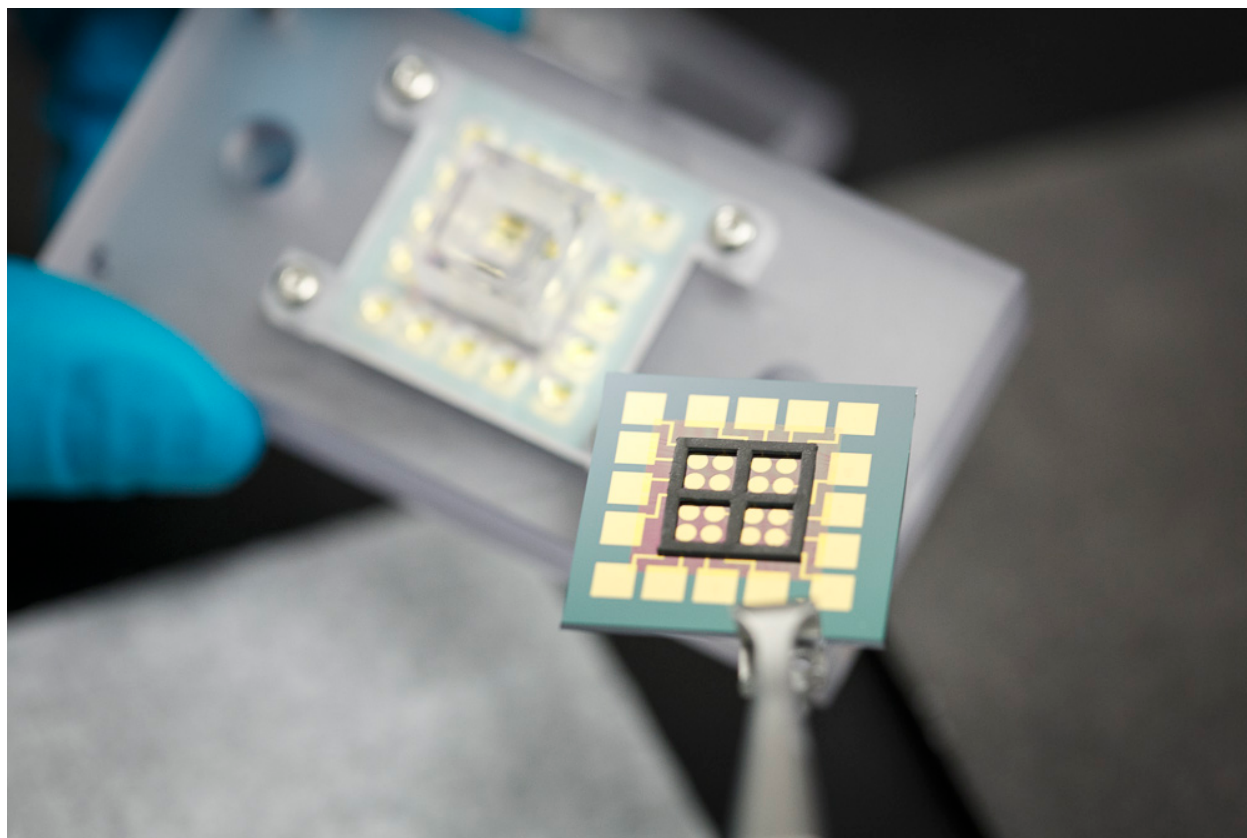

**Figure S1:** Image of the custom chip used for study.

**Figure S2:** Images of custom temperature controlled electrochemical setup

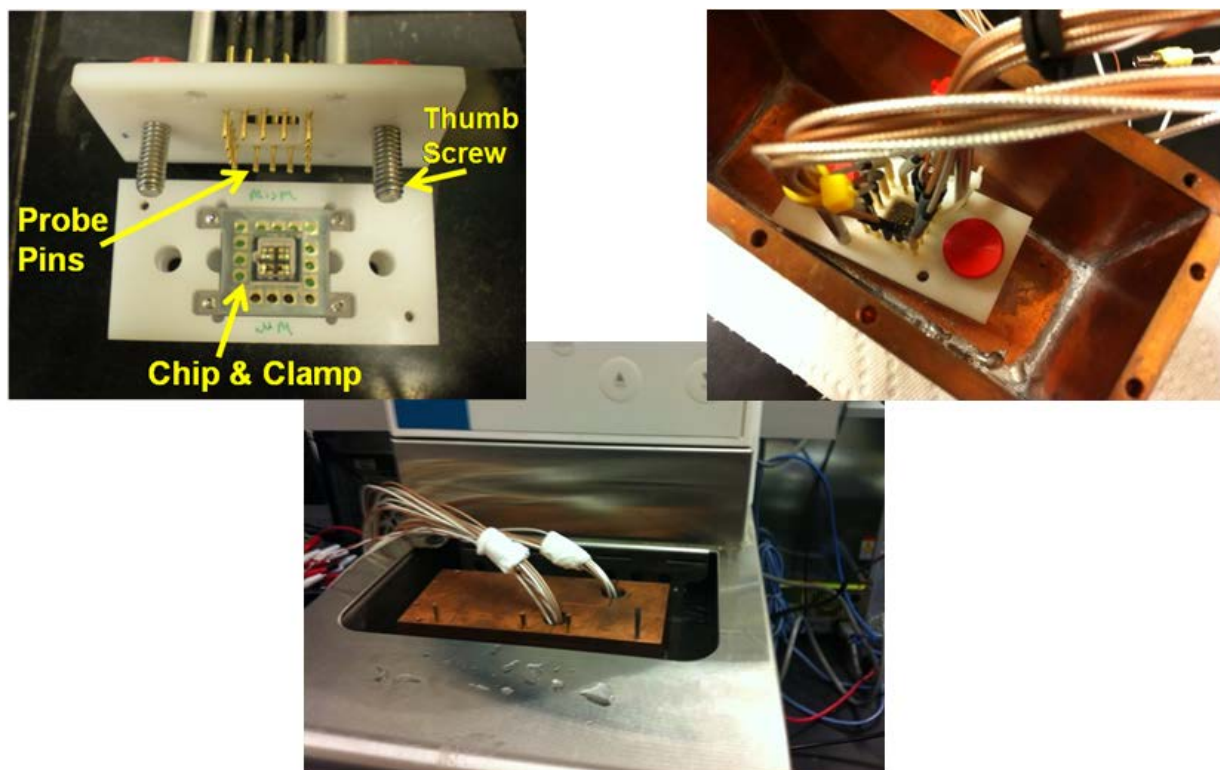

**Figure S2.** Setup for attaining temperature control of multiplexed electrode chips. (Upper) Illustration of the chip layout for studying self-assembled monolayers of probe-modified DNA on multiplexed gold electrodes. (Middle left) Chips are connected to external electrochemical hardware with a modular test mount that also maintains buffer solution over the chip. (Middle right and lower) The entire mount is then placed in a copper box that is submerged in a temperature-controlled water bath. This ensures temperature uniformity over the entire mount.

**Figure S3:** Chemical drawings of the C6 linker and Nile Blue redox probe coupling

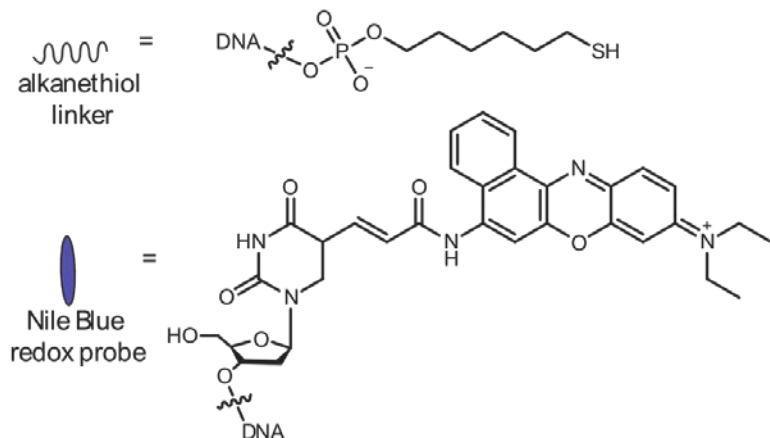

**Figure S3.** DNA modifiers used in this study. The moiety used for self-assembling DNA to the electrode surface is the C6 Thiol Modifier S-S from Glen Research. The Nile Blue redox probe was attached by coupling the dye, Nile Blue A perchlorate, to the NHS Carboxy DT phosphoramidite from Glen Research.
